# Supplementary material
Source: PubMed Central journal article supplement (PMC9887733)
Supplement: NIHMS1830981-supplement-Supp_Materials.pdf [file NIHMS1830981-supplement-Supp_Materials.pdf]

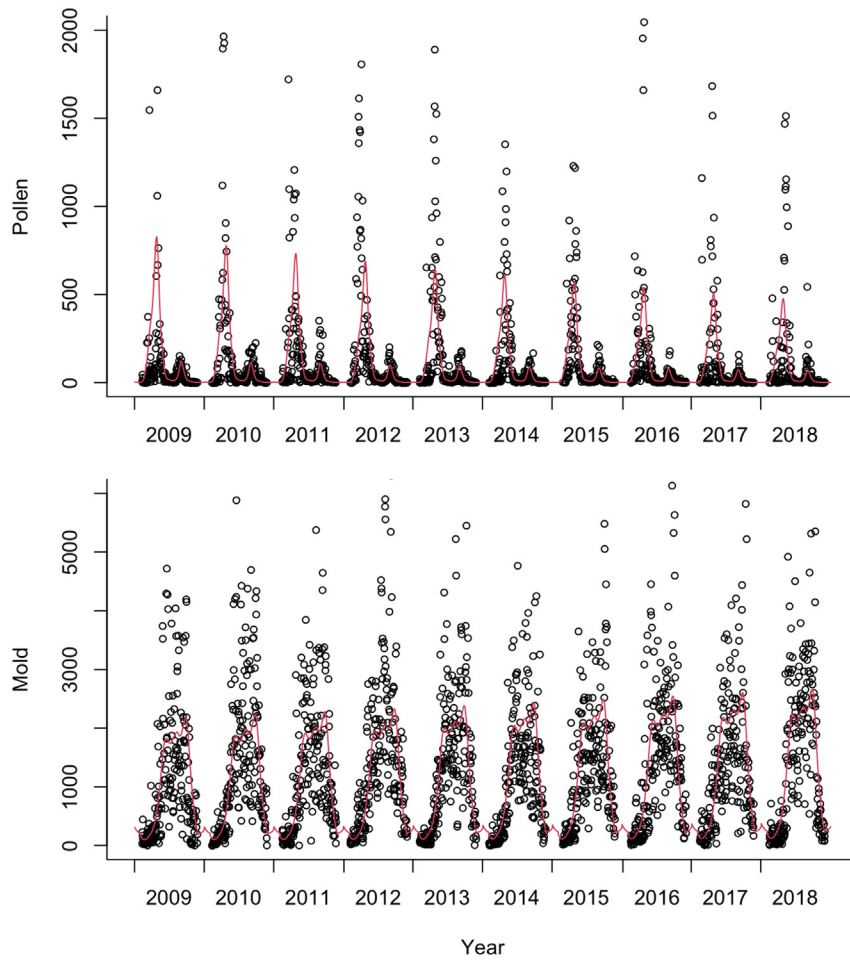

**FIG E1.** Smoother splines for daily pollen and mold measures.

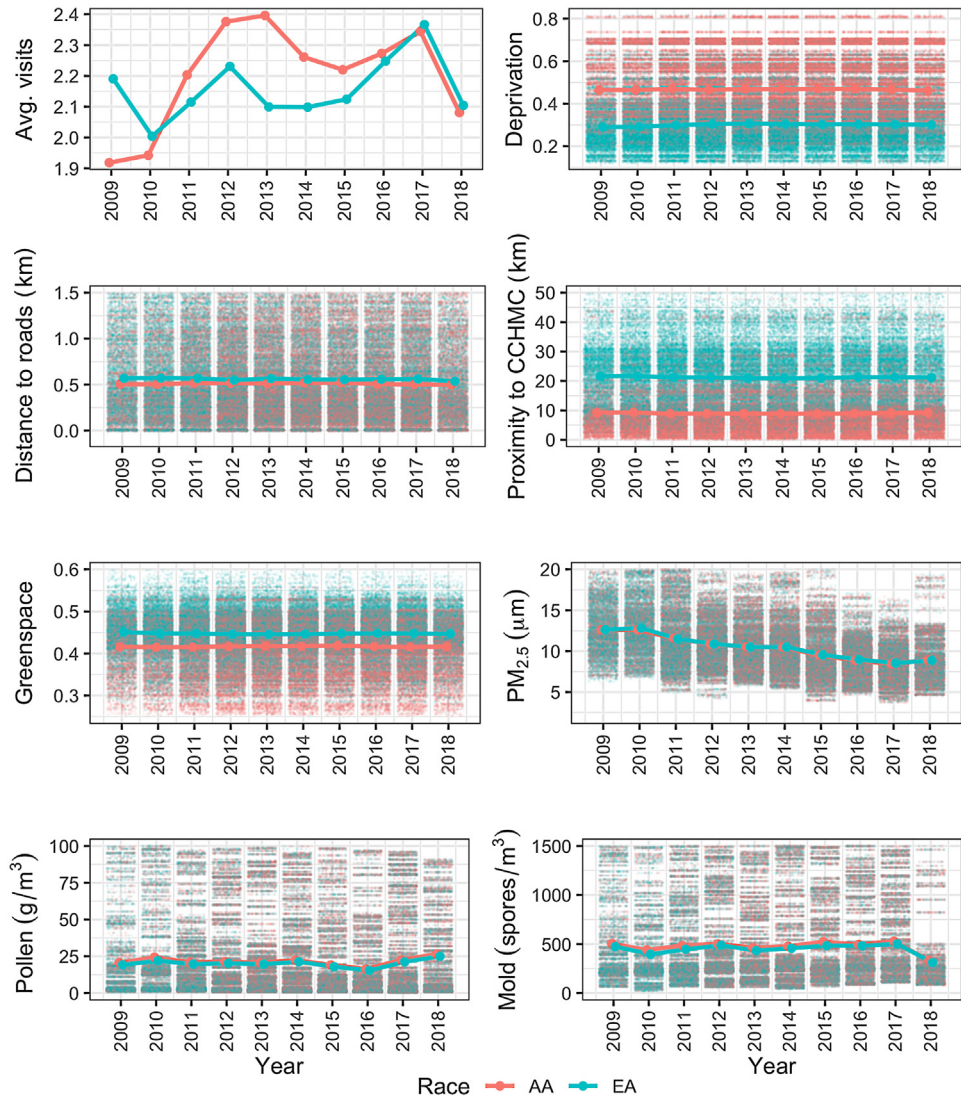

**FIG E2.** Longitudinal exploratory data analysis of neighborhood-level factor per year by race. Avg., Average.

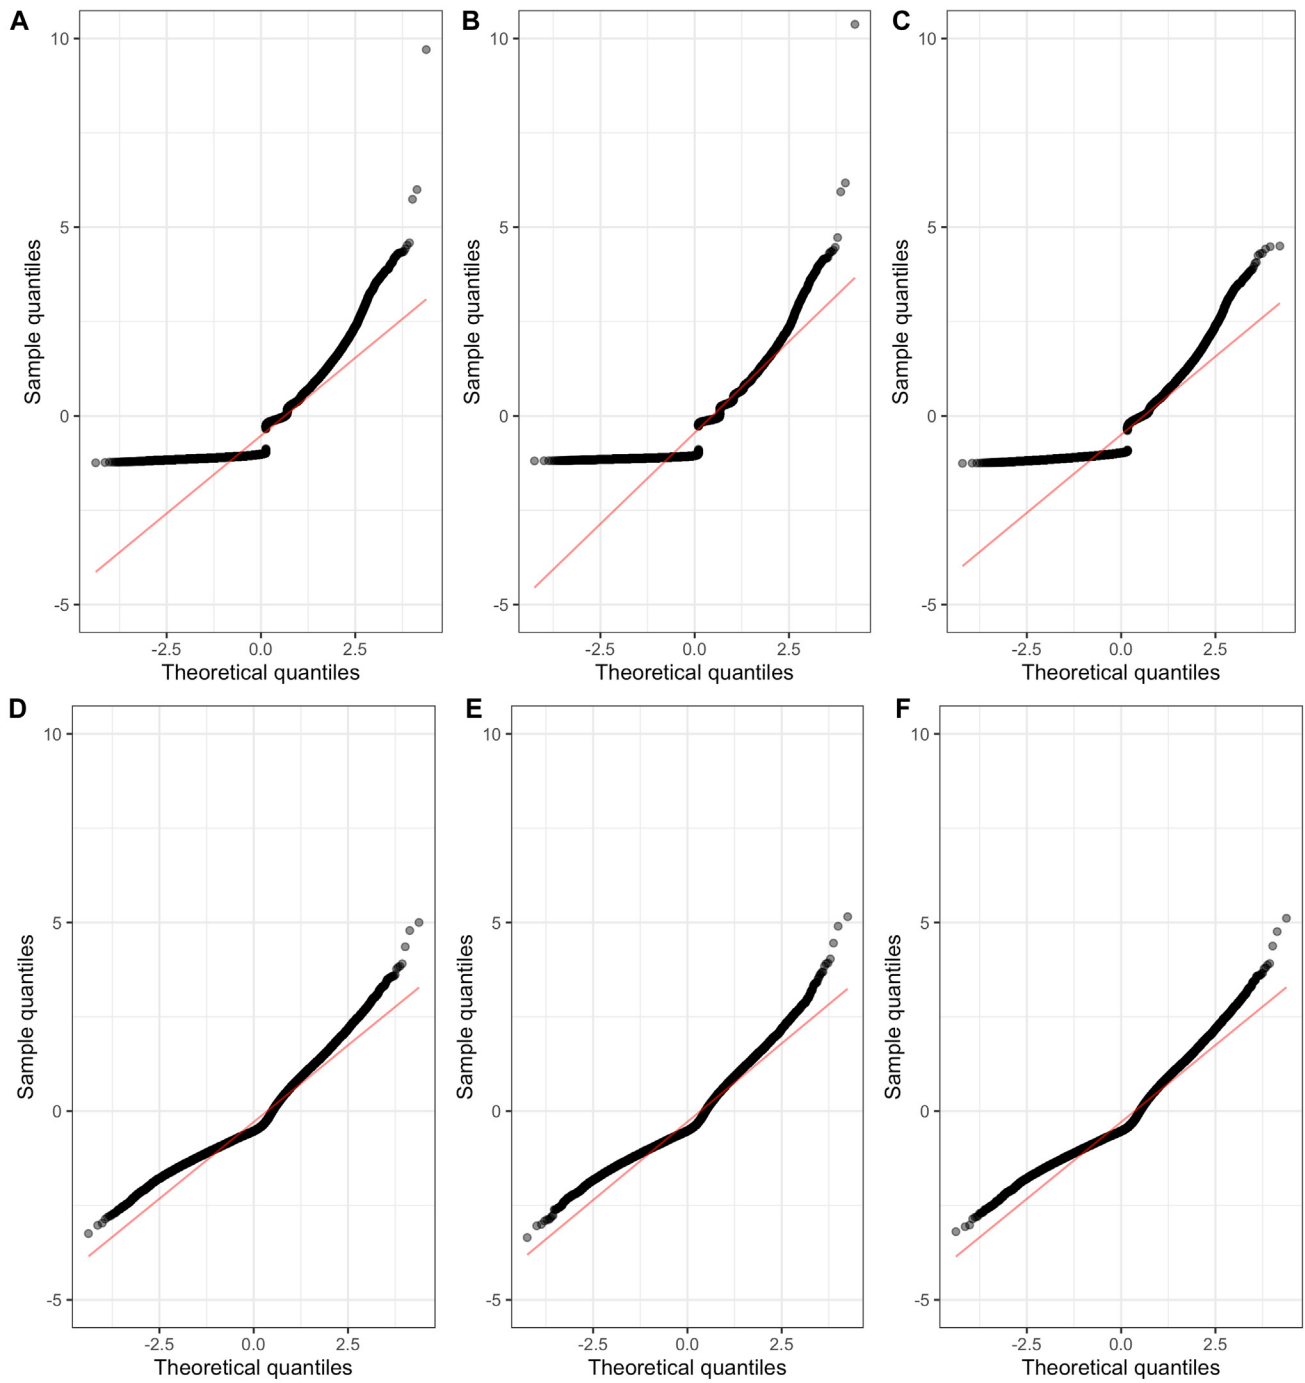

**FIG E3.** Calibration plots: (A) negative binomial model using full cohort, (B) negative binomial model using AAs cohort, (C) negative binomial model using EAs model, (D) mixed-effects negative binomial model using full cohort, (E) mixed-effects negative binomial model using AAs cohort, and (F) mixed-effects negative binomial model using EAs cohort.

**TABLE E1.** Unadjusted associations for frequent ED utilization and multicollinearity assessment (VIF) for ED visits

| Characteristic                               | Expected visits (95% CI) | P value* | VIF  |
|----------------------------------------------|--------------------------|----------|------|
| Age                                          | 2.076 (2.064-2.089)      | <.001    | 1.05 |
| Sex                                          |                          |          |      |
| Female                                       | Ref                      |          |      |
| Male                                         | 2.015 (2.003-2.027)      | <.001    | 1.01 |
| Race                                         |                          |          |      |
| EA                                           | Ref                      |          |      |
| AA                                           | 2.065 (2.052-2.077)      | <.001    | 1.72 |
| Insurance type                               |                          |          |      |
| Commercial                                   | Ref                      |          |      |
| Medicaid                                     | 2.099 (2.086-2.112)      | <.001    | 1.35 |
| Deprivation index                            | 2.018 (2.006-2.03)       | <.001    | 1.72 |
| Proximity to CCHMC's facility (km)           | 1.972 (1.96-1.983)       | <.001    | 1.67 |
| Proximity to major roads (km)                | 1.986 (1.975-1.998)      | <.001    | 1.16 |
| Proportion of green space                    | 1.973 (1.961-1.984)      | <.001    | 1.31 |
| PM <sub>2.5</sub>                            | 1.959 (1.948-1.97)       | <.001    | 1.29 |
| Daily pollen exposure (g/m <sup>3</sup> )    | 1.966 (1.955-1.977)      | <.001    | 1.33 |
| Daily mold exposure (spores/m <sup>3</sup> ) | 2.043 (2.03-2.055)       | <.001    | 1.32 |

Ref, Reference group; VIF, variance inflation factor.

\*P < .05 is statistically significant.
